# Supplementary material for: The helminth glycoprotein omega‐1 improves metabolic homeostasis in obese mice through type 2 immunity‐independent inhibition of food intake
Source: PubMed Central journal article supplement — FASEB J. 2021 Jan 21;35(2):e21331. doi: 10.1096/fj.202001973R (PMC7898285; doi:10.1096/fj.202001973r), 2021-01-21
Supplement: FSB2-35-na-s001.pdf [file FSB2-35-na-s001.pdf]

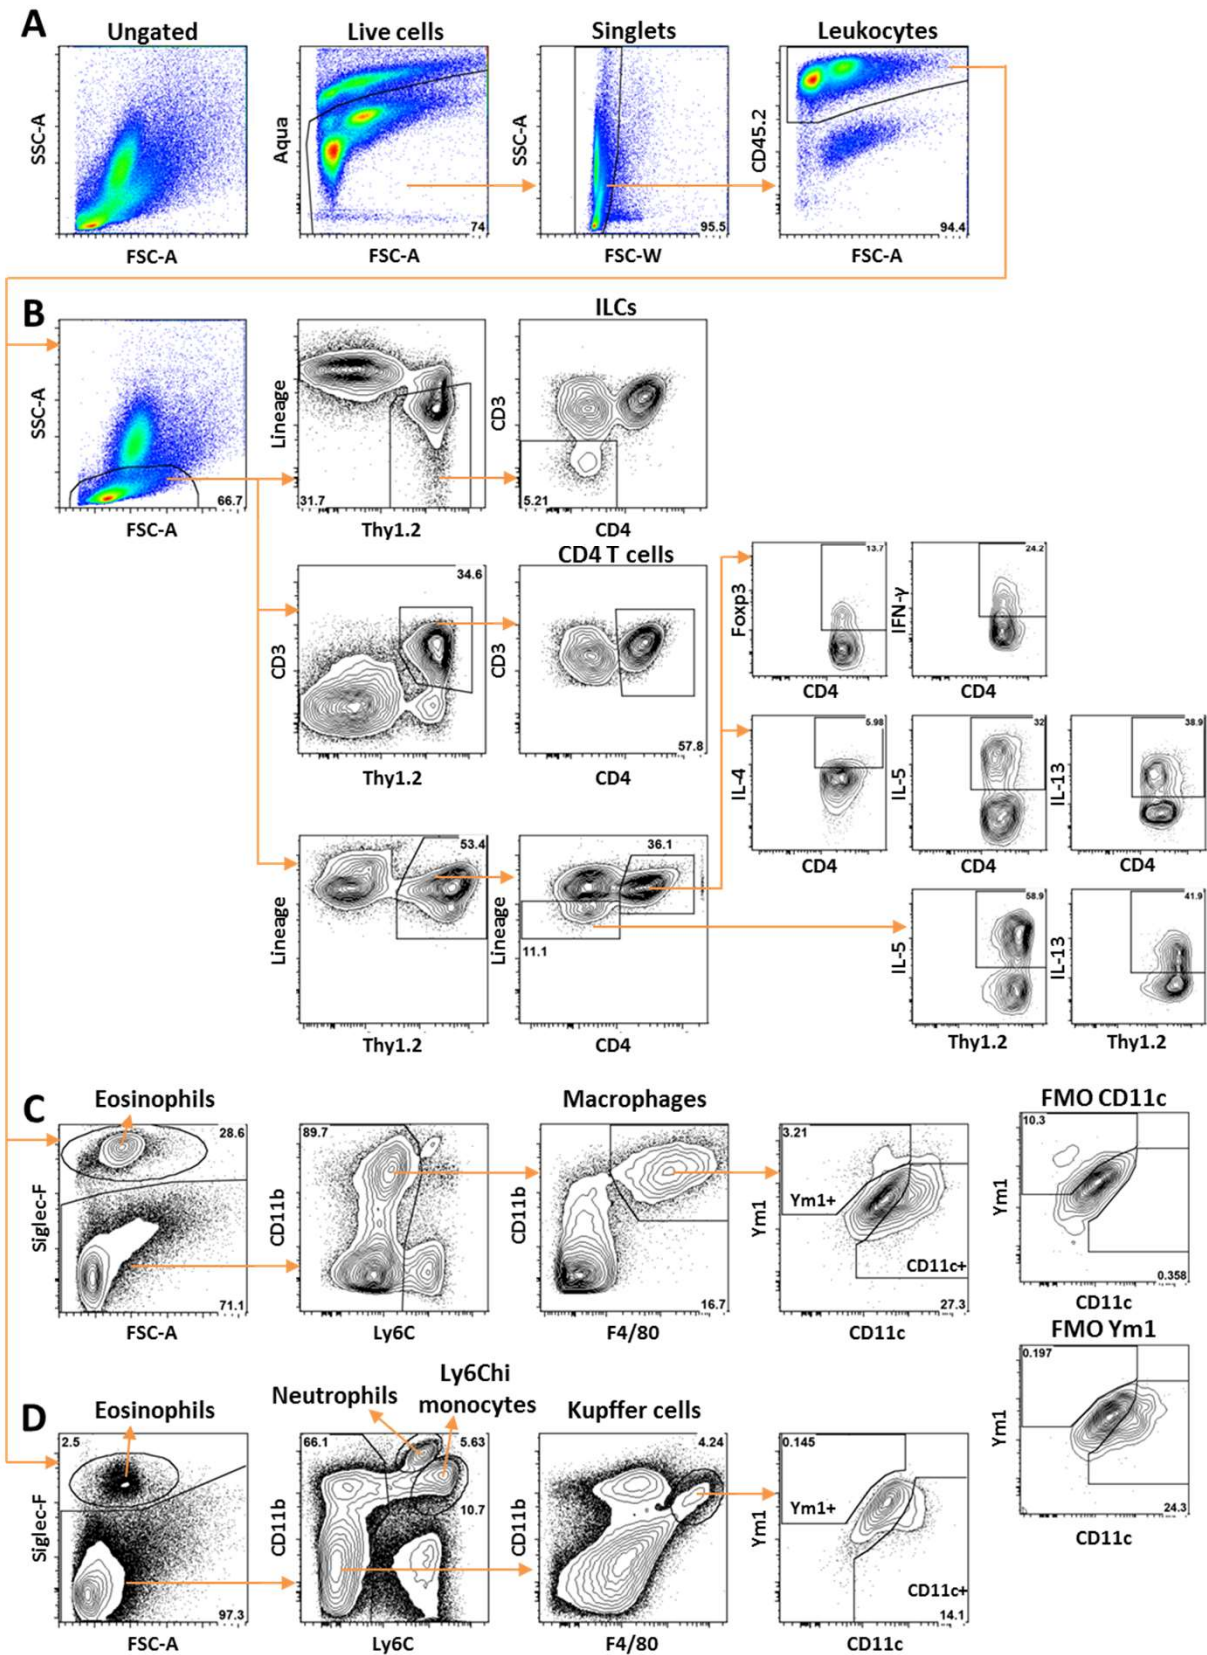

**Figure S1. Gating strategies.** Isolated cells were pre-gated on Aqua-CD45<sup>+</sup> single cells (A). The gating strategy for eWAT and liver analyses of ILCs, CD4 T cells and intracellular cytokine production is shown (B). The lineage channel includes antibodies against CD11b, CD11c, B220, GR-1, NK1.1 and CD3. The gating strategy for eWAT eosinophils, CD11c<sup>+</sup>Ym1<sup>-</sup> macrophages and CD11c-Ym1<sup>+</sup> macrophages is shown (C), including Fluorescence Minus One (FMO) controls for CD11c and Ym1. The gating strategy for liver eosinophils, monocytes, CD11c<sup>+</sup>Ym1<sup>-</sup> Kupffer cells and CD11c-Ym1<sup>+</sup> Kupffer cells is shown (D).
