# Supplementary material for: The helminth glycoprotein omega‐1 improves metabolic homeostasis in obese mice through type 2 immunity‐independent inhibition of food intake
Source: PubMed Central journal article supplement — FASEB J. 2021 Jan 21;35(2):e21331. doi: 10.1096/fj.202001973R (PMC7898285; doi:10.1096/fj.202001973r), 2021-01-21
Supplement: FSB2-35-na-s002.pdf [file FSB2-35-na-s002.pdf]

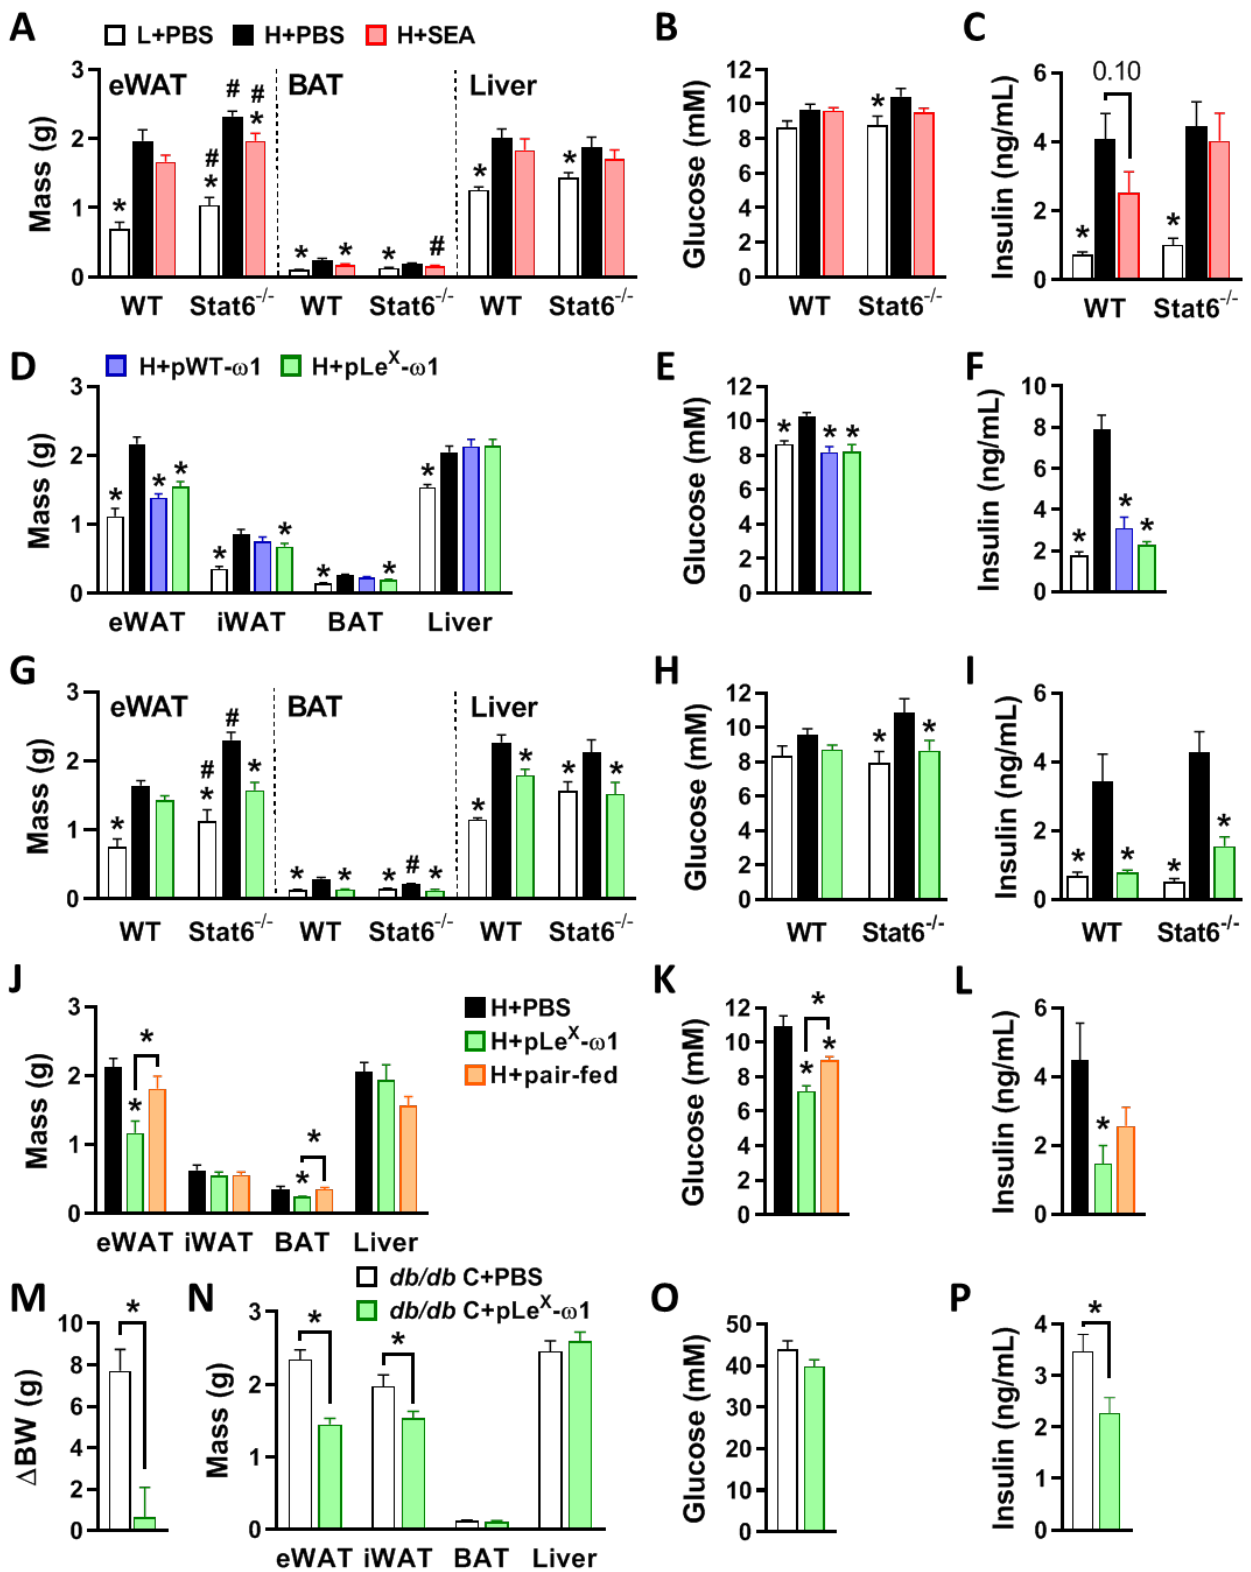

**Figure S2. Body composition and fasting blood glucose and plasma insulin levels after SEA and pLe<sup>X</sup>- $\omega$ 1 treatment in obese mice.** Supplementary data for Figure 1 (A-C), 3 (D-F), 4 (G-I), 5 (J-L) and 6 (M-P). Mice were fed a LFD or a HFD and treated as described in the corresponding figure legends. The weights of epididymal WAT (eWAT), inguinal WAT (iWAT), intrascapular brown adipose tissue (BAT) and the liver were measured after 4 weeks (A, D, G, J and N). Blood glucose (B, E, H, K and O) and plasma insulin (C, F, I, L and P) were measured at week 4 in 4h-fasted mice. Body weight change after 4 weeks was determined in *db/db* mice treated with PBS or 50  $\mu$ g pLe<sup>X</sup>- $\omega$ 1 (M). Results are expressed as means  $\pm$  SEM. \**P*<0.05 vs HFD or as indicated, #*P*<0.05 vs WT (n = 3-6 mice per group in A-C, G-P and 11-18 mice per group in D-F).
