# Supplementary material for: The helminth glycoprotein omega‐1 improves metabolic homeostasis in obese mice through type 2 immunity‐independent inhibition of food intake
Source: PubMed Central journal article supplement — FASEB J. 2021 Jan 21;35(2):e21331. doi: 10.1096/fj.202001973R (PMC7898285; doi:10.1096/fj.202001973r), 2021-01-21
Supplement: FSB2-35-na-s003.pdf [file FSB2-35-na-s003.pdf]

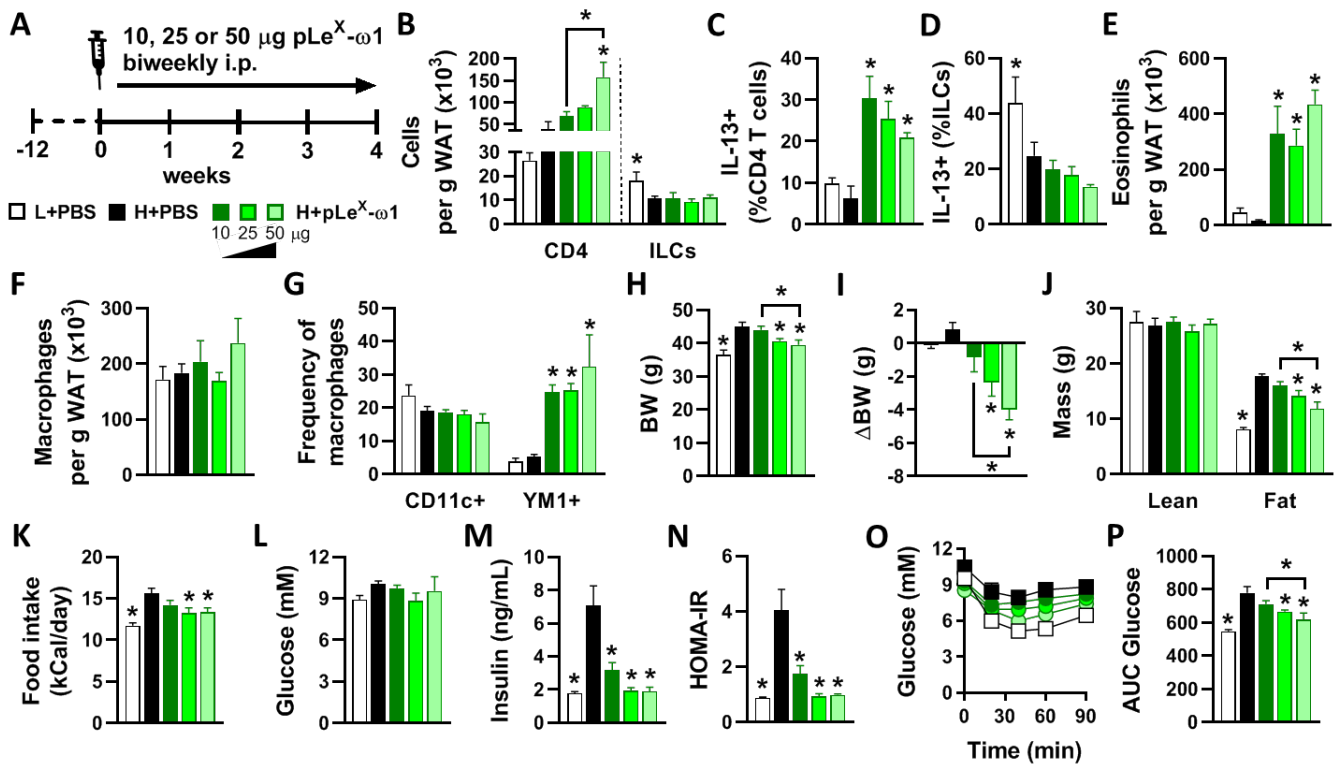

**Figure S3. pLe<sup>X</sup>-ω1 increases adipose tissue type 2 immune cells and improves whole-body insulin sensitivity in a dose-dependent manner.** Mice were fed a LFD (white bars) or a HFD for 12 weeks, and next received biweekly intraperitoneal injections of PBS (black bars) or 10 μg, 25 μg or 50 μg pLe<sup>X</sup>-ω1 (green bars) during 4 weeks (A). At the end of the experiment, eWAT was collected, processed and analyzed as described in the legend of Figure 1. The numbers of CD4 T cells and ILCs per gram tissue (B), and the frequencies of IL-13+ CD4 T cells (C) and ILCs (D) were determined. Numbers of eosinophils (E) and macrophages (F) per gram tissue, and percentages of CD11c<sup>+</sup>YM1<sup>-</sup> and CD11c<sup>-</sup>YM1<sup>+</sup> macrophages (G) were determined. Body weight (H-I) and body composition (J) were determined after 4 weeks. Food intake was monitored throughout the treatment period (K). Fasting blood glucose (L) and plasma insulin levels (M) were determined at week 4, and HOMA-IR (N) was calculated. An i.p. insulin tolerance test (O-P) was performed at week 3. Results are expressed as means ± SEM. \*  $P < 0.05$  vs HFD or as indicated (n = 3-4 mice per group).
