# Supplementary material for: The helminth glycoprotein omega‐1 improves metabolic homeostasis in obese mice through type 2 immunity‐independent inhibition of food intake
Source: PubMed Central journal article supplement — FASEB J. 2021 Jan 21;35(2):e21331. doi: 10.1096/fj.202001973R (PMC7898285; doi:10.1096/fj.202001973r), 2021-01-21
Supplement: FSB2-35-na-s005.pdf [file FSB2-35-na-s005.pdf]

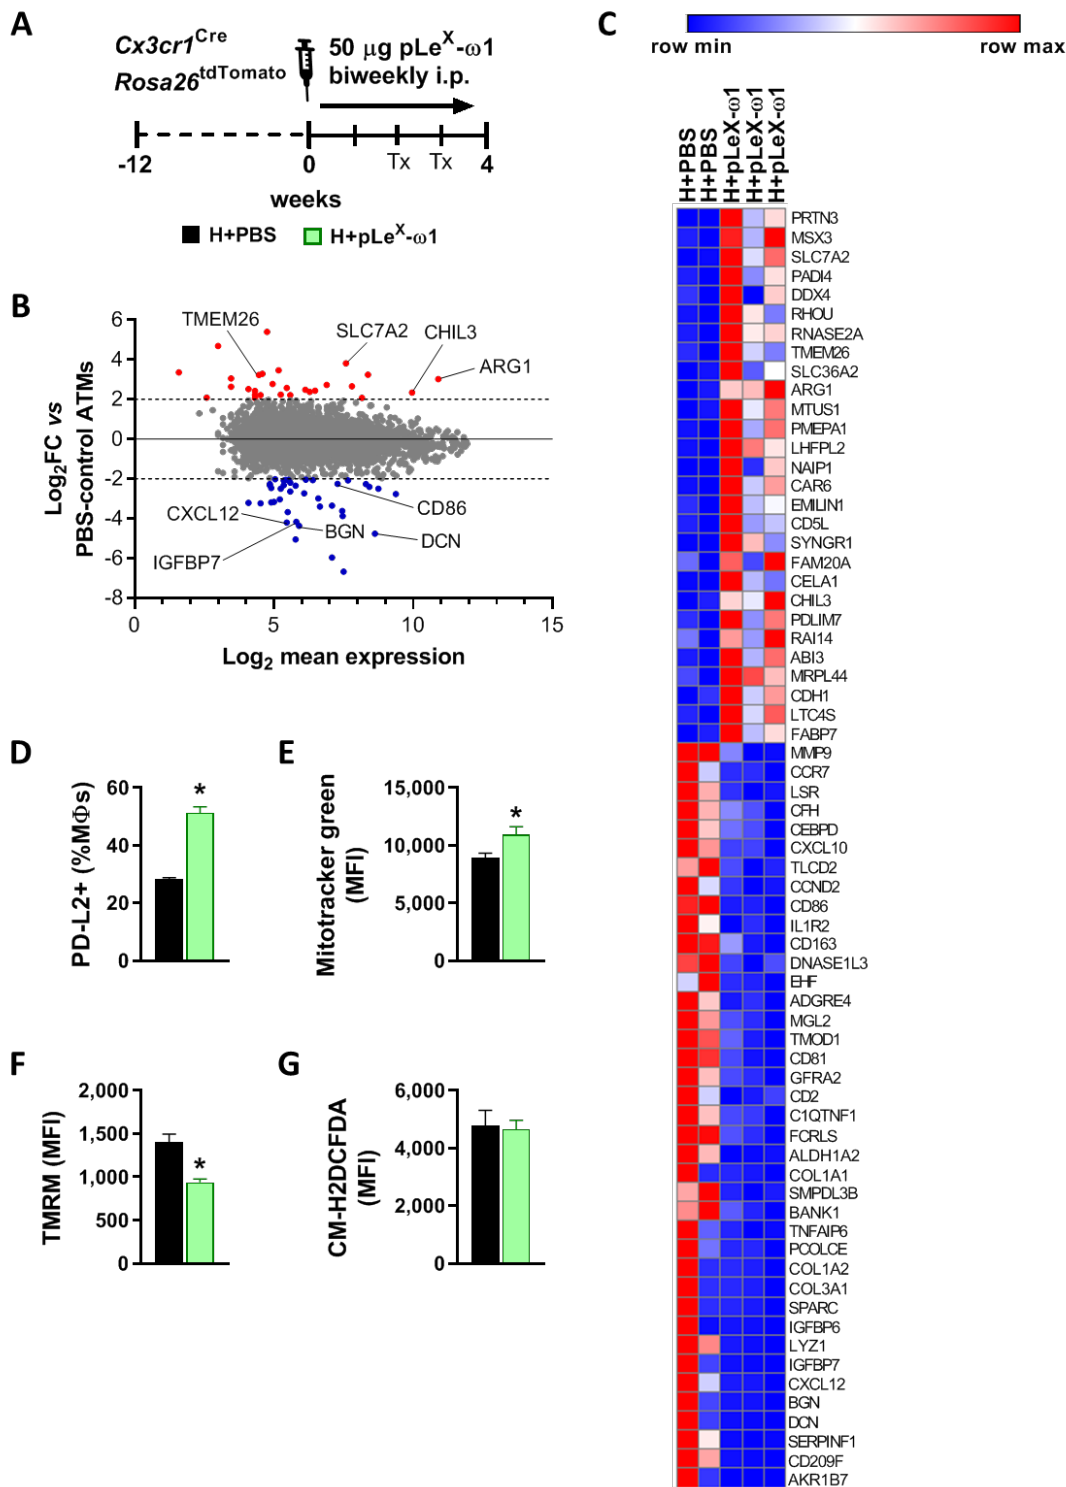

**Figure S5. Adipose tissue macrophages from mice treated with pLe<sup>X-ω1</sup> display some alternatively-activated phenotypic features.** *Cx3cr1*<sup>CreER</sup> *R26*<sup>tdTomato</sup> mice were fed a HFD for 12 weeks, and next received biweekly intraperitoneal injections of PBS or 50 µg pLe<sup>X-ω1</sup> during 4 weeks. At week 2 and 3, mice received an oral gavage with tamoxifen (Tx) to label CX3CR1<sup>+</sup> cells (A). At the end of the experiment, adipose tissue macrophages (ATMs) from eWAT SVF were FACS-sorted and RNA was isolated and sequenced. MA plot (B) shows the mean gene expression in pLe<sup>X-ω1</sup> ATMs, as expressed in log<sub>2</sub> fold change versus PBS-control ATMs. Upregulated genes (log<sub>2</sub> fold change > 2) are indicated in red and downregulated genes (log<sub>2</sub> fold change < -2) are indicated in blue. Normalized read counts of upregulated and downregulated genes are visualized in a heatmap (C). WT mice were fed a HFD for 12 weeks, and next received biweekly intraperitoneal injections of PBS (black bars) or 50 µg pLe<sup>X-ω1</sup> (green bars) during 4 weeks. Percentage of PD-L2<sup>+</sup> macrophages (D) was determined. MitoTracker Green (mitochondrial mass; E), TMRM (mitochondrial membrane potential; F) and CM-H2DCFDA (total ROS; G) fluorescence intensities were determined in PD-L2<sup>+</sup> macrophages. Results are expressed as means ± SEM. \* *P*<0.05 vs HFD (n = 2-3 mice per group in A-B, and 3-4 mice per group in C-F).
