# Supplementary material for: The helminth glycoprotein omega‐1 improves metabolic homeostasis in obese mice through type 2 immunity‐independent inhibition of food intake
Source: PubMed Central journal article supplement — FASEB J. 2021 Jan 21;35(2):e21331. doi: 10.1096/fj.202001973R (PMC7898285; doi:10.1096/fj.202001973r), 2021-01-21
Supplement: FSB2-35-na-s006.pdf [file FSB2-35-na-s006.pdf]

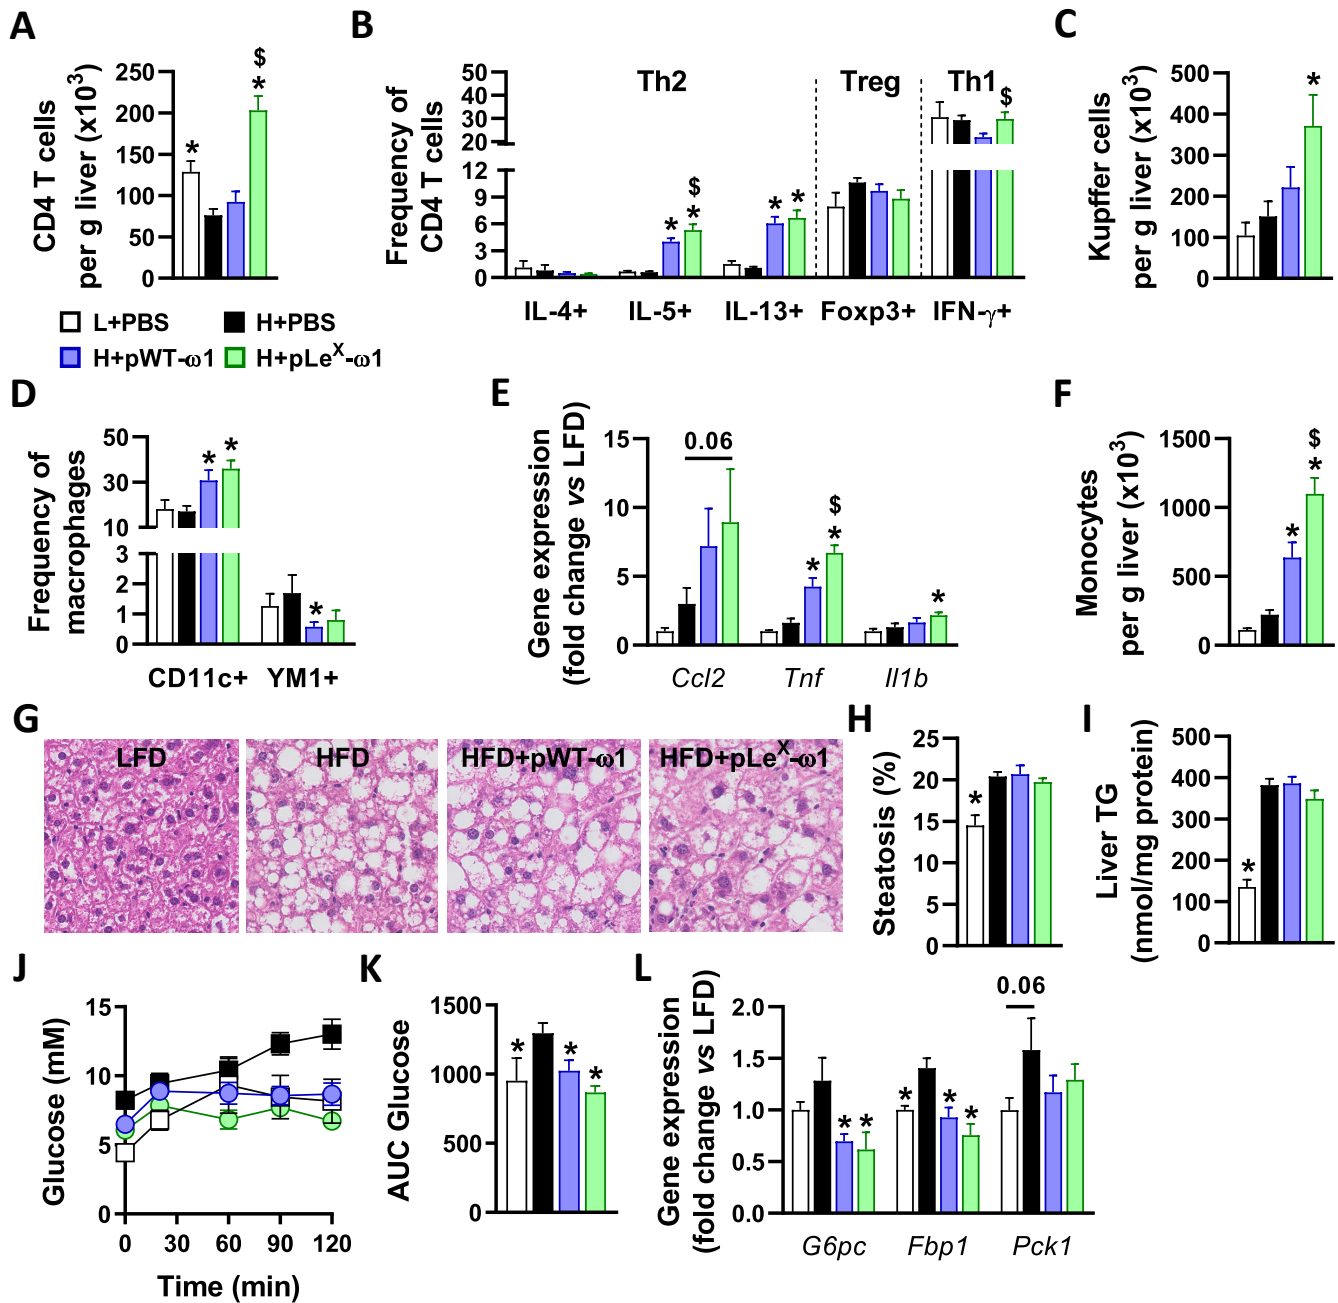

**Figure S6.  $\omega$ 1 glycovariants do not affect hepatic steatosis, but reduce gluconeogenesis in obese mice.** Mice were fed a LFD (white bars) or a HFD for 12 weeks, and next received biweekly intraperitoneal injections of PBS (black bars) or 50  $\mu$ g pWT- $\omega$ 1 (blue bars) or pLe<sup>X</sup>- $\omega$ 1 (green bars) during 4 weeks, as described in the legend of Figure 2. At sacrifice, CD45<sup>+</sup> liver cells were isolated and analyzed by flow cytometry. The numbers of CD4 T cells (A), Kupffer cells (KC, C) and Ly6C<sup>hi</sup> monocytes (F) per gram tissue, and the frequencies of T helper (B) and KC subsets (D) were determined. The mRNA expression of pro-inflammatory genes (E) was determined. Hepatic steatosis was assessed using hematoxylin/eosin staining in fixed tissues (G-H) and hepatic triglycerides content was determined (I). Intraperitoneal pyruvate tolerance test was performed during week 4. Blood glucose levels were measured at the indicated time points (J) and the AUC of the glucose excursion curve was calculated (K). The mRNA expression of the main gluconeogenic genes was determined (L). Data shown are a pool of at least two independent experiments, except for J-K. Results are expressed as means  $\pm$  SEM. \*  $P < 0.05$  vs HFD, \$  $P < 0.05$  vs pWT- $\omega$ 1, #  $P < 0.05$  vs WT (n = 5-18 mice per group in A-L, and 3-6 mice per group in J-K).
