# Supplementary material for: The helminth glycoprotein omega‐1 improves metabolic homeostasis in obese mice through type 2 immunity‐independent inhibition of food intake
Source: PubMed Central journal article supplement — FASEB J. 2021 Jan 21;35(2):e21331. doi: 10.1096/fj.202001973R (PMC7898285; doi:10.1096/fj.202001973r), 2021-01-21
Supplement: FSB2-35-na-s007.pdf [file FSB2-35-na-s007.pdf]

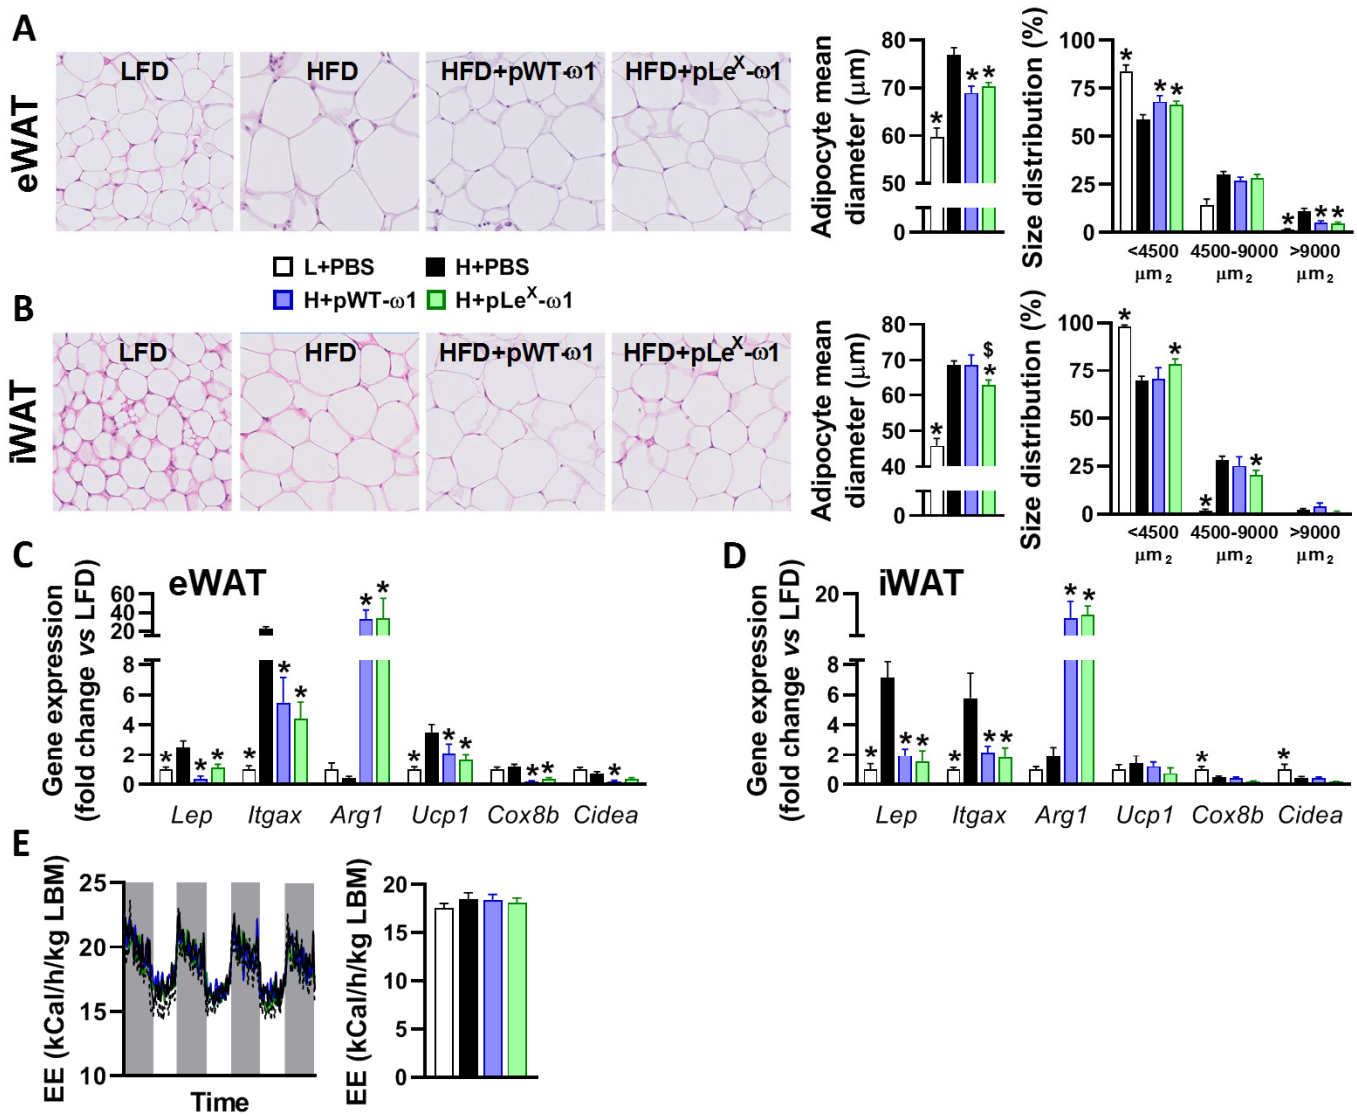

**Figure S7.  $\omega$ 1 glycovariants reduce adipocyte size, but neither increase adipose tissue being nor whole-body energy expenditure in obese mice.** Mice were fed a LFD (white bars) or a HFD for 12 weeks, and next received biweekly intraperitoneal injections of PBS (black bars) or 50  $\mu$ g pWT- $\omega$ 1 (blue bars) or pLe<sup>X</sup>- $\omega$ 1 (green bars) as described in the legend of Figure 2. At sacrifice, the eWAT (A,C) or iWAT (B,D) were collected. Adipocyte diameter and size distribution were determined after H&E staining (A,B). mRNA expressions of the indicated genes (C,D) were determined by RT-PCR and expressed relative to the *Rplp0* gene as fold change versus LFD-fed mice. Energy expenditure (E), corrected for lean body mass, was measured for 3 consecutive days using fully automated single-housed metabolic cages during the first week of treatment. Data shown are a pool of two independent experiments. Results are expressed as means  $\pm$  SEM. \*  $P < 0.05$  vs HFD (n = 4-10 mice per group).
